# Supplementary material
Source: publisher figshare collection journal article supplement (https://acs.figshare.com/ndownloader/files/5143663)
Supplement: Supplementary file 1 [file 5143663]

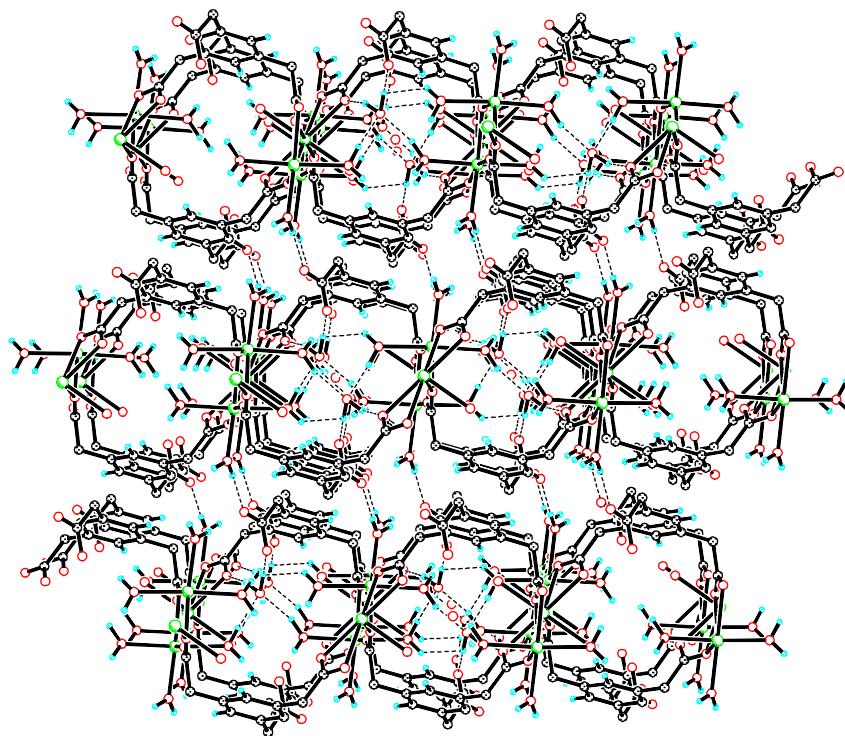

Figure S1 Crystal packing diagram for **1** with hydrogen bonds indicated by dashed lines.

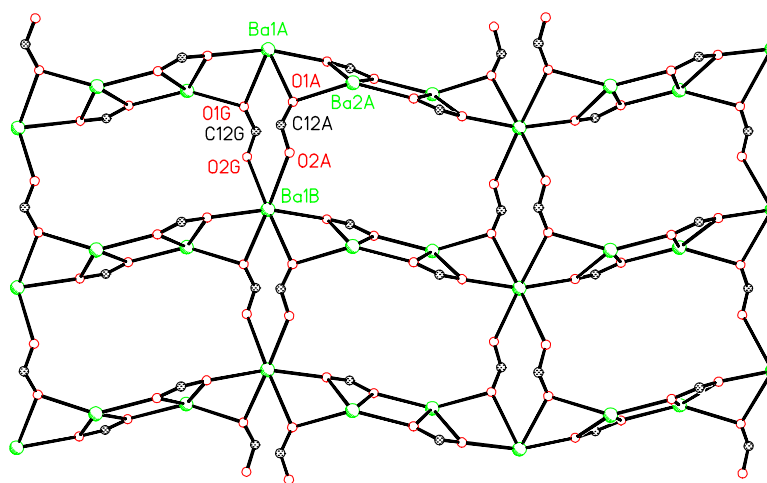

Figure S2 Ba-O wave-like chains of **2** linked by  $\text{-COO}^-$  to form a 2D structure.

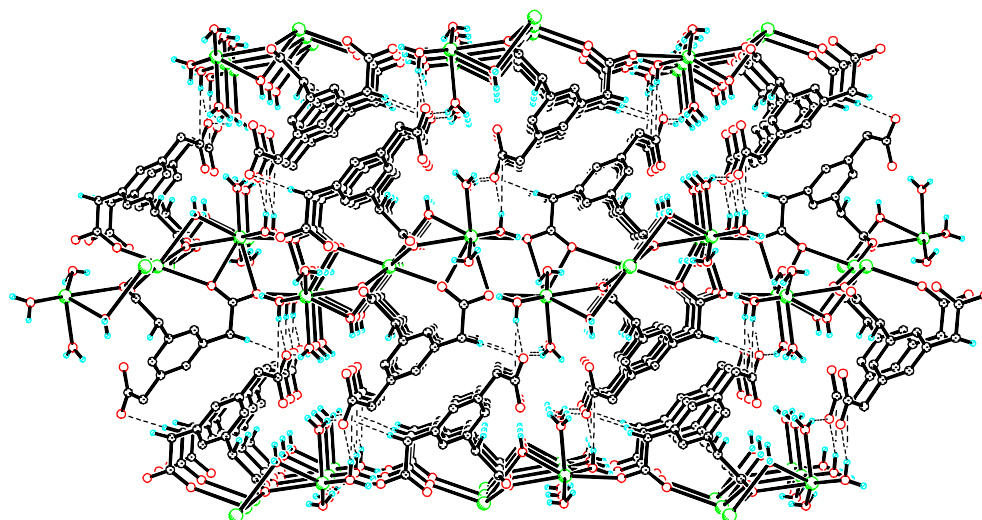

Figure S3 Crystal packing diagram for **2** with hydrogen bonds indicated by dashed lines.
